# Supplementary material for: A conserved RpoS-dependent small RNA controls the synthesis of major porin OmpD
Source: PubMed Central journal article supplement — Nucleic Acids Res. 2011 Dec 16;40(8):3623–40. doi: 10.1093/nar/gkr1156 (PMC3333887; doi:10.1093/nar/gkr1156), 2011-12-16
Supplement: supp_gkr1156_Supplementary_Material_kf_final_2011_11_23.pdf [file supp_gkr1156_Supplementary_Material_kf_final_2011_11_23.pdf]

Supplementary Material

**A conserved RpoS-dependent small RNA  
controls the synthesis of major porin OmpD**

Kathrin S. Fröhlich, Kai Papenfort, Allison A. Berger, and Jörg Vogel\*

\*Corresponding author; E-mail: joerg.vogel@uni-wuerzburg.de

This Supplement contains:

**Supplementary Figures S1-S7**

**Supplementary Tables S1-S3**

**Supplementary References 103-105**

Figure S1

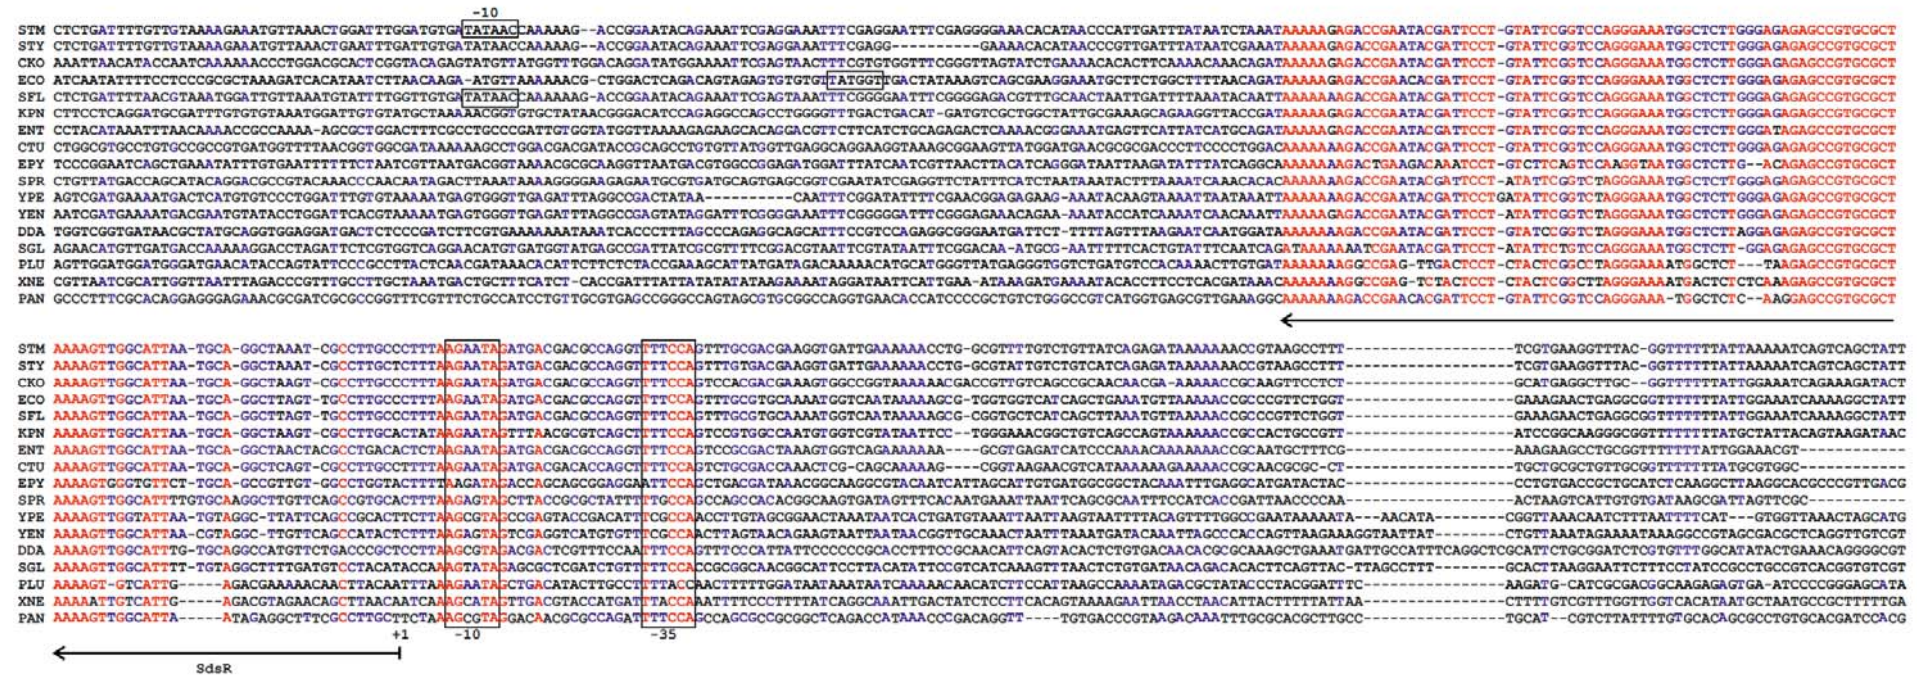

Non-redundant alignment of the *sraC* gene including the upstream promoter region from various enterobacterial species. All nucleotides are coloured regarding their degree of conservation (red: high conservation; blue: partial conservation; black: little or no conservation). STM: *Salmonella typhimurium*; STY: *Salmonella typhi*; CKO: *Citrobacter koseri*; ECO: *Escherichia coli*; SFL: *Shigella flexneri*; ENT: *Enterobacter*; CTU: *Cronobacter turicensis*; KPN: *Klebsiella pneumoniae*; SPR: *Serratia proteamaculans*; YPE: *Yersinia pestis*; YEN: *Yersinia enterocolitica*; DDA: *Dickeya dadantii*; PAN: *Pantoea ananatis*; SGL: *Sodalis glossinidius*; EPY: *Erwinia pyrifoliae*; Plu: *Photobacterium luminescens*; XNE: *Xenorhabdus nematophila*.

**Figure S2**

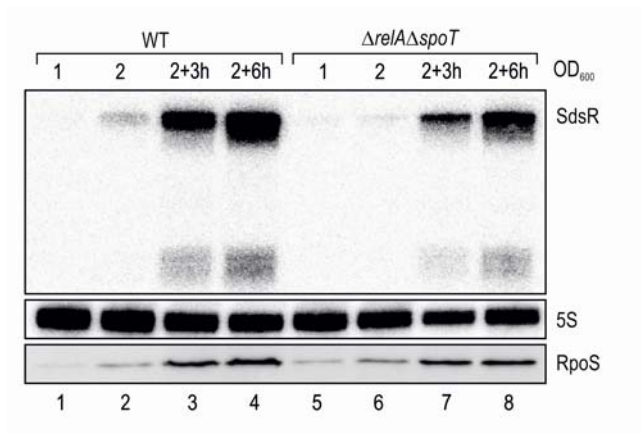

Expression of SdsR is decreased in *Salmonella* depleted of ppGpp. *Salmonella* wild-type (JVS-1574) and a  $\Delta relA\Delta spoT$  double mutant (JVS-1505) were grown in LB to an OD<sub>600</sub> of 1.0, 2.0 and 3 or 6 hours after cells had reached an OD<sub>600</sub> of 2.0. SdsR levels were determined by Northern blotting of total RNA. 5S RNA levels were analyzed to confirm equal loading. Expression of RpoS was monitored by Western blotting of protein samples taken from the same cultures.

**Figure S3**

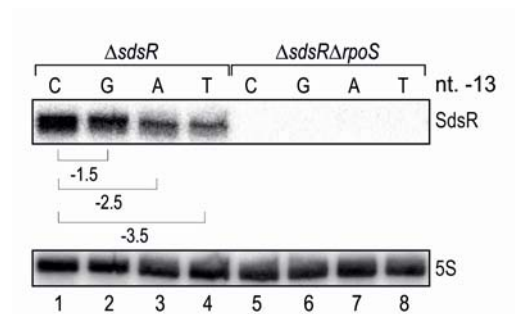

Permutation of cytosine at position -13 in the *sdsR* promoter decreases SdsR expression levels. *Salmonella*  $\Delta sdsR$  (JVS-8827) and  $\Delta sdsR\Delta rpoS$  (JVS-9551) mutants carrying the complementation plasmid *psdsR* (pVP203-1) or three derivatives differing in the nucleotide at position -13 in the *sdsR* promoter (*psdsR* C-13G: pKF106-2; *psdsR* C-13A: pKF107-1; *psdsR* C-13T: pKF108-3) were grown in LB to 3 hours after the culture had reached an  $OD_{600}$  of 2.0. SdsR expression was analyzed by Northern blotting of total RNA; quantification of fold-changes in SdsR abundances is indicated below the panel. Probing for 5S RNA confirmed equal loading.

**Figure S4**

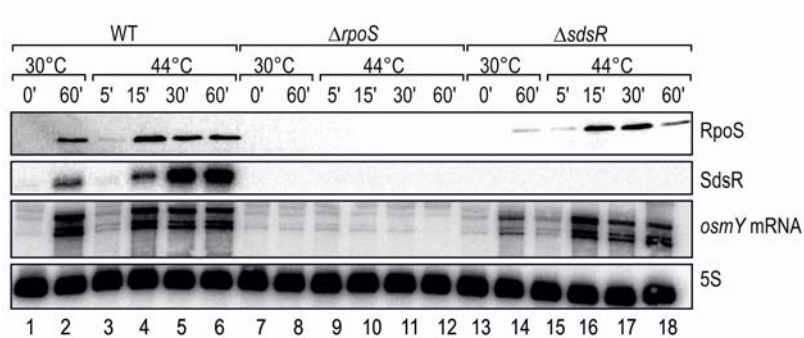

SdsR sRNA and *osmY* mRNA are rapidly induced under heat stress in wild-type but not in *rpoS* mutant bacteria. *Salmonella* wild-type (JVS-1574),  $\Delta rpoS$  (JVS-5487) and  $\Delta sdsR$  (JVS-8827) were grown to an OD<sub>600</sub> of 0.3 at 30°C when cultures were split and either maintained at 30°C or subjected to heat-shock at 44°C. Total RNA samples withdrawn prior to and at selected time-points after temperature up-shift were analyzed by Northern blotting; SdsR and *osmY* mRNA were detected using gene-specific riboprobes, 5S levels were determined as loading control. Expression of RpoS was monitored by Western blotting.

**Figure S5**

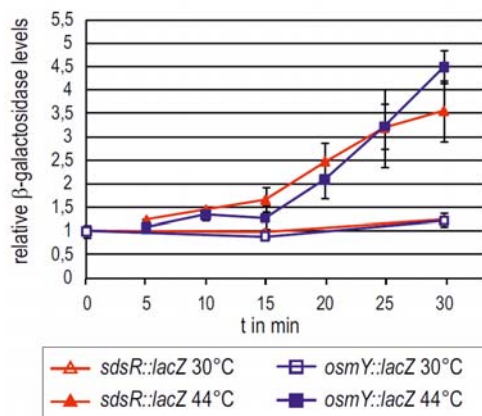

Transcriptional activity at *sdsR* and *osmY* promoters upon heat stress was compared employing *Salmonella sdsR::lacZ* (JVS-8717; red triangles) and *osmY::lacZ* (JVS-9145; blue squares) reporter constructs. Cells were grown to an  $OD_{600}$  of 0.3 at 30°C when cultures were split and either maintained at 30°C or subjected to heat-shock at 44°C. Relative  $\beta$ -galactosidase activities were determined over the course of 30 min in culture samples grown at 30°C (filled symbols) or 44°C (open symbols). Standard deviation was calculated from three biological replicates.

Figure S6

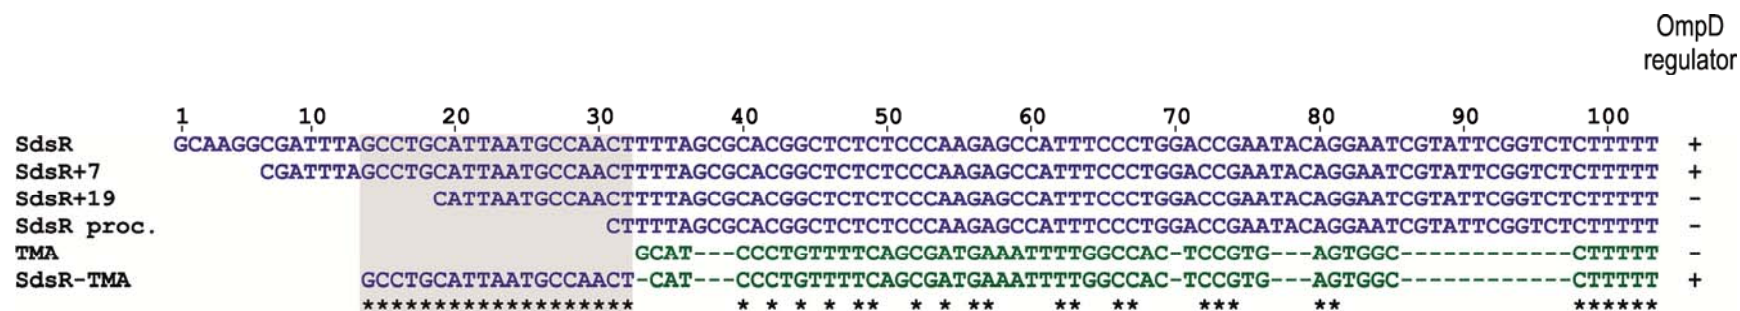

Alignment of SdsR, truncated SdsR variants and SdsR-MicA chimera as depicted in Fig. 6A. SdsR-derived sequences are shown in blue, fragments of MicA are in green. Conserved nucleotides are marked by asterisks at the bottom of the alignment. A potential regulatory effect on OmpD is indicated (+/-), and the region of SdsR involved in *ompD* mRNA-pairing is boxed in light grey.

**Figure S7**

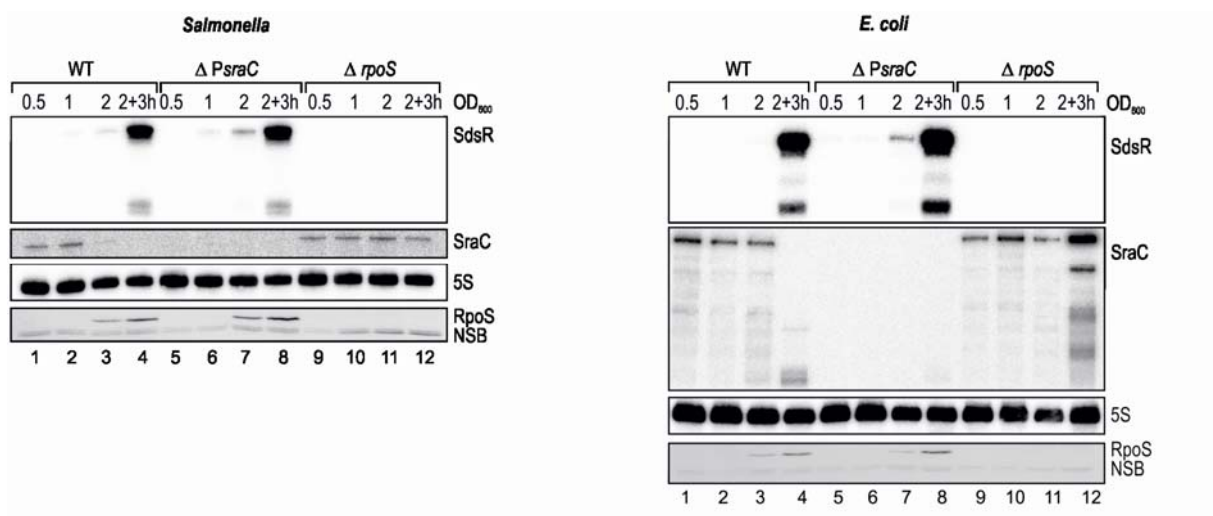

Interdependence of SdsR and SraC expression in *Salmonella* and *E. coli*. Expression of SdsR and SraC sRNAs were compared by Northern blot analysis of total RNA isolated from *Salmonella* and *E. coli* wild-type (JVS-1574 and JVS-5105, respectively), *sraC* promoter mutants (JVS-9251 and JVS-9312, respectively) and *rpoS* mutants (JVS-5487 and JVS-9322, respectively) grown in LB to an OD<sub>600</sub> of 0.5, 1.0, 2.0 and 3 hours after cells had reached an OD<sub>600</sub> of 2.0. Probing for 5S RNA confirmed equal loading. RpoS levels were determined by Western blotting of total protein samples; a non-specific band (NSB) served as loading control.



**Table S1**

| <b>name</b> | <b>sequence 5'-3'</b>                                                       |
|-------------|-----------------------------------------------------------------------------|
| JVO-0048    | TTTCGAGGAATTTTCGAGGGGAAACACATAACCCATTGATTTATAATCTAAGTGTAGGCTGGAGCTGCTTC     |
| JVO-0049    | TTTTATCTCTGATAACAGACAAAAACGCCAGGTTTTTTCAATCACCTTCGTGGTCCATATGAATATCCTCCTTAG |
| JVO-0051    | GTTTTTCTCGAGCATCCGGATGGATTGACA                                              |
| JVO-0052    | GTTTTTCTAGAGTCTGGCRCCGTTTAT                                                 |
| JVO-0322    | CTACGCGTTTTCACTTCTGAGTTC                                                    |
| JVO-0396    | TTCATCGCTGAAAACAGG                                                          |
| JVO-0802    | GTTTTGACGTCAAATCAATATTGAAACGG                                               |
| JVO-0862    | GTTTTTCTCGAGTCGACCCGCTGTACCT                                                |
| JVO-0874    | CCTGGCTTTCAGTACGGT                                                          |
| JVO-0902    | 5'Phosphate-GCAAGGCGATTTAGCC                                                |
| JVO-0903    | TTTTTCTAGAAACACATAACCCATTGATT                                               |
| JVO-0997    | GTTTTTTTAATACGACTCACTATAGGCCTGTATTCGGTCCAGG                                 |
| JVO-1032    | GGCTCTTGGGAGAGAGC                                                           |
| JVO-1043    | GTTTTTCTCGAGCACATAATCTTAAACAAGAATGTT                                        |
| JVO-2191    | GAAACTTATTATTGAACTTATGCCACTCCGTCAATTTAAAAATAGTCGTATATCCAGTGATTTTTTCTCCAT    |
| JVO-2192    | GTCACCATCACTTCCGTTATCA                                                      |
| JVO-2309    | CTGGCGTCGTCACTA                                                             |
| JVO-2390    | CTGGCGTCGTCACTA                                                             |
| JVO-2484    | ATGAAACTTAAGTTAGTGGCAG                                                      |
| JVO-2678    | GTTTTATGCATGCCATTGACAAAACGCC                                                |
| JVO-4262    | 5'Phosphate-TCATGTATTCTTAAAGGGCAAG                                          |
| JVO-4263    | 5'Phosphate-TCATATATTCTTAAAGGGCAAG                                          |
| JVO-4264    | 5'Phosphate-TCATTTATTCTTAAAGGGCAAG                                          |
| JVO-4265    | CGACGCCAGGTTTCC                                                             |
| JVO-4314    | TGCCACTAACTTAAAGTTTCAT                                                      |
| JVO-4731    | 5'Phosphate-ACTTTTAGCGCACGGCTC                                              |
| JVO-5738    | CGGCGCTAATAGCGACGGGGCCGATATTGATATTAAACTTACTGTCCCTAGTGCTTGG                  |
| JVO-5739    | TAAAATGGCTCTGTCCGCAAAGACAACGACCAGTGAACGTCTGCACGGCATACTCCTTAT                |
| JVO-6533    | CTGGAAAACCTGGCGTCGTCACTATTCTTAAAGGGCAAGGTGTAGGCTGGAGCTGCTTC                 |
| JVO-6534    | TTTCGAGGGGAAACACATAACCCATTGATTTATAATCTAAGTCCATATGAATATCCTCCTTAG             |
| JVO-7023    | GTTTTTTTAATACGACTCACTATAGGCAAGGCGATTTAGCC                                   |
| JVO-7025    | AGAGACCGAATACGATTCC                                                         |
| JVO-7159    | CGATTTAGCCTGCATTAATG                                                        |
| JVO-7161    | CATTAATGCCAACTTTTAGCG                                                       |
| JVO-7163    | TGGGATTAATGCAGGCTAA                                                         |
| JVO-7224    | GCCTGCATTAATGCCAACTCATCCCTGTTTTCAAGC                                        |
| JVO-7225    | TTGGGAGCAGGCGTTGT                                                           |
| JVO-7328    | 5'Phosphate-CAGGGAAGTCACTGCCACTG                                            |
| JVO-7692    | ATGCCGTTCATGCGTG                                                            |
| JVO-7693    | GTTTTTTTTTAATACGACTCACTATAGGGAGGTTTCGGTTCGCTTG                              |
| JVO-7742    | GCTTACGTGATGCTCTGATTTTGTGTAAAAGAAATGTTAGGTCCATATGAATATCCTCCTTAG             |
| JVO-7743    | GTGTTTCCCCTCGAAATTCCTCGAAATTTCTCGAATTTTCGTGTAGGCTGGAGCTGCTTC                |
| JVO-7859    | AGATCACATAATCTTAAACAAGAATGTTAAAAAACGCTGGAGGTCCATATGAATATCCTCCTTAG           |
| JVO-7860    | TTTATCTGTTAAAAGCCAGAAGCATTTCCTTCGCTGACTTGTGTAGGCTGGAGCTGCTTC                |
| E1          | 5'Phosphate-UUCACUGUUCUAGCGGCCGAUGCUC-idT <sup>1</sup>                      |
| E3 RACE     | GGCCGCTAAGAACAGTGAA                                                         |
| M13 fwd     | GTA AACGACGGCCAG                                                            |
| M13 rev     | CAGGAAACAGCTATGAC                                                           |
| pLacO C     | 5'Phosphate-GTGCTCAGTATCTTGTTATCCG                                          |
| pZE-A       | GTGCCACCTGACGTCTAAGA                                                        |
| pZE-Cat     | TGGGATATATCAACGGTGGT                                                        |
| pZE-T1      | CGGCGGATTTGTCTACT                                                           |
| pZE-Xba     | TCGTTTTATTTGATGCCTCTAGA                                                     |
| pZE-A       | GTGCCACCTGACGTCTAAGA                                                        |

<sup>1</sup> idT: 3' inverted deoxythymidine

**Table S2**

| Plasmid trivial name        | Plasmid stock name | Expressed fragment           | Comment                                                                                                                                                                    | Origin, Marker            | Reference  |
|-----------------------------|--------------------|------------------------------|----------------------------------------------------------------------------------------------------------------------------------------------------------------------------|---------------------------|------------|
|                             | pJV300             |                              | pP <sub>L</sub> control plasmid, expresses a ~50 nt nonsense transcript derived from <i>rrnB</i> terminator                                                                | ColE1, Amp <sup>R</sup>   | (57)       |
| pBAD                        | pKP8-35            |                              | pP <sub>BAD</sub> control plasmid, expresses a ~50 nt nonsense transcript derived from <i>rrnB</i> terminator                                                              | pBR322, Amp <sup>R</sup>  | (21)       |
|                             | pRH800             |                              | pP <sub>tac</sub> control plasmid                                                                                                                                          | pBR322, Amp <sup>R</sup>  | (62)       |
| pP <sub>tac</sub> -RpoS     | pRL40.1            | <i>rpoS</i>                  | <i>E. coli rpoS</i> expressed from constitutive P <sub>tac</sub> promoter                                                                                                  | pBR322, Amp <sup>R</sup>  | (62)       |
| pP <sub>L</sub> -SdsR       | pKF68-3            | SdsR                         | ColE1 plasmid based on pZE12-luc; expresses <i>Salmonella</i> SdsR from constitutive P <sub>LlacO</sub> promoter                                                           | ColE1, Amp <sup>R</sup>   | This study |
| pP <sub>L</sub> -SdsR proc. | pKF73-1            | SdsR proc.                   | ColE1 plasmid based on pZE12-luc; expresses truncated <i>Salmonella</i> SdsR (starting at processing site +31) from constitutive P <sub>LlacO</sub> promoter               | ColE1, Amp <sup>R</sup>   | This study |
| pP <sub>L</sub> -SdsR +7    | pKF97-1            | SdsR +7                      | ColE1 plasmid based on pZE12-luc; expresses truncated <i>Salmonella</i> SdsR (starting at +7) from constitutive P <sub>LlacO</sub> promoter                                | ColE1, Amp <sup>R</sup>   | This study |
| pP <sub>L</sub> -SdsR +19   | pKF99-1            | SdsR +19                     | ColE1 plasmid based on pZE12-luc; expresses truncated <i>Salmonella</i> SdsR (starting at +19) from constitutive P <sub>LlacO</sub> promoter                               | ColE1, Amp <sup>R</sup>   | This study |
| pP <sub>L</sub> -TMA        | pFS135             | TMA                          | ColE1 plasmid based on pZE12-luc; expresses truncated <i>Salmonella</i> MicA (starting at +23) from constitutive P <sub>LlacO</sub> promoter                               | ColE1, Amp <sup>R</sup>   | (50)       |
| pP <sub>L</sub> -SdsR-TMA   | pKF105-1           | SdsR-TMA                     | ColE1 plasmid based on pZE12-luc; expresses truncated <i>Salmonella</i> SdsR (+14-32) fused to +23 of <i>Salmonella</i> MicA from constitutive P <sub>LlacO</sub> promoter | ColE1, Amp <sup>R</sup>   | This study |
| pP <sub>L</sub> -SdsR*      | pKF101-26          | SdsR*                        | ColE1 plasmid based on pZE12-luc; expresses <i>Salmonella</i> SdsR with SNE G26C from constitutive P <sub>LlacO</sub> promoter                                             | ColE1, Amp <sup>R</sup>   | This study |
| pBAD-SdsR                   | pKP19-8            | SdsR                         | expresses <i>Salmonella</i> SdsR from arabinose-inducible P <sub>BAD</sub> promoter                                                                                        | ColE1, Amp <sup>R</sup>   | This study |
| <i>gfp</i>                  | pJV859-8           | <i>gfp</i>                   | Control plasmid, expresses <i>gfp</i> from constitutive P <sub>Ltet0-1</sub> promoter                                                                                      | pSC101*, Cam <sup>R</sup> | (57)       |
| D+3:: <i>gfp</i>            | pVP192-1           | <i>ompD</i> +3:: <i>gfp</i>  | expresses <i>ompD</i> +3:: <i>gfp</i> translational fusion from constitutive P <sub>Ltet0-1</sub> promoter                                                                 | pSC101*, Cam <sup>R</sup> | (52)       |
| D+45:: <i>gfp</i>           | pVP188-1           | <i>ompD</i> +45:: <i>gfp</i> | expresses <i>ompD</i> +45:: <i>gfp</i> translational fusion from constitutive P <sub>Ltet0-1</sub> promoter                                                                | pSC101*, Cam <sup>R</sup> | (52)       |
| D+78:: <i>gfp</i>           | pVP206-1           | <i>ompD</i> +78:: <i>gfp</i> | expresses <i>ompD</i> +78:: <i>gfp</i> translational fusion from constitutive P <sub>Ltet0-1</sub> promoter                                                                | pSC101*, Cam <sup>R</sup> | (52)       |
| D+99:: <i>gfp</i>           | pVP207-1           | <i>ompD</i> +99:: <i>gfp</i> | expresses <i>ompD</i> +99:: <i>gfp</i> translational fusion from constitutive P <sub>Ltet0-1</sub> promoter                                                                | pSC101*, Cam <sup>R</sup> | (52)       |
| <i>psdsR</i>                | pVP203-1           | SdsR; SraC                   | pSC101* plasmid based on pZE12-luc; expresses <i>Salmonella</i> SdsR from endogenous promoter                                                                              | pSC101*, Amp <sup>R</sup> | This study |
| <i>psdsR</i> C-13G          | pKF106-2           | SdsR; SraC                   | pSC101* plasmid based on pZE12-luc; expresses <i>Salmonella</i> SdsR from endogenous promoter with SNE (C-13G)                                                             | pSC101*, Amp <sup>R</sup> | This study |
| <i>psdsR</i> C-13A          | pKF107-1           | SdsR; SraC                   | pSC101* plasmid based on pZE12-luc; expresses <i>Salmonella</i> SdsR from endogenous promoter with SNE (C-13A)                                                             | pSC101*, Amp <sup>R</sup> | This study |
| <i>psdsR</i> C-13T          | pKF108-3           | SdsR; SraC                   | pSC101* plasmid based on pZE12-luc; expresses <i>Salmonella</i> SdsR from endogenous promoter with SNE (C-13T)                                                             | pSC101*, Amp <sup>R</sup> | This study |
| <i>pompD</i>                | pVP42-3            | <i>ompD</i>                  | <i>ompD</i> complementation plasmid; expresses <i>ompD</i> from its own promoter                                                                                           | pSC101*, Cam <sup>R</sup> | (52)       |
| <i>pompD</i> *              | pKF109-1           | <i>ompD</i> *                | expresses <i>ompD</i> * (C46G) from its own promoter                                                                                                                       | pSC101*, Cam <sup>R</sup> | This study |

|  |                   |                                 |                                                                                                                                                          |                                             |             |
|--|-------------------|---------------------------------|----------------------------------------------------------------------------------------------------------------------------------------------------------|---------------------------------------------|-------------|
|  | pZE12- <i>luc</i> | <i>luc</i>                      | general cloning plasmid                                                                                                                                  | ColE1, Amp <sup>R</sup>                     | (70)        |
|  | pVP003            | <i>luc</i>                      | general cloning plasmid; low copy version of pZE12- <i>luc</i>                                                                                           | pSC101*, Amp <sup>R</sup>                   | (57)        |
|  | pBAD Myc-His A    |                                 | pBAD expression plasmid                                                                                                                                  |                                             | Invitrogen  |
|  | pKD4              |                                 | template plasmid KanR                                                                                                                                    | oriRy, Amp <sup>R</sup>                     | (58)        |
|  | pKD46             | $\gamma$ - $\beta$ - <i>exo</i> | Temperature-sensitive lambda red recombinase expression plasmid; expresses $\lambda$ RED-recombinase from arabinose-inducible P <sub>araB</sub> promoter | oriR101, Amp <sup>R</sup>                   | (58)        |
|  | pCP20             | FLP - ci857                     | Temperature-sensitive Flp recombinase expression plasmid                                                                                                 | pSC101, Amp <sup>R</sup> , Cam <sup>R</sup> | (103)       |
|  | pKG136            |                                 | For FLP-mediated <i>lacZ-Y</i> integration to construct transcriptional <i>lac</i> fusions                                                               | oriR6K, Kan <sup>R</sup>                    | J.M. Slauch |

**Table S3**

| Trivial name in the manuscript                                                 | Bacterium                | Stock name | Genotype; relevant markers                                                                                                                                                                                 | Source/reference         |
|--------------------------------------------------------------------------------|--------------------------|------------|------------------------------------------------------------------------------------------------------------------------------------------------------------------------------------------------------------|--------------------------|
| wild-type                                                                      | <i>S. typhimurium</i>    | JVS-0007   | SL1344 <i>hisG rpsL xyl</i>                                                                                                                                                                                | laboratory stock         |
| wild-type                                                                      | <i>E. coli</i>           | JVS-5105   | <i>relA+</i> derivative of MC4100 ( <i>araD139 (argF-lac)205 flb-5301 pstF25 rpsL150 deoC1 relA1</i> )                                                                                                     | T. Nyström; (104)        |
| wild-type                                                                      | <i>Shigella flexneri</i> | JVS-0012   | BS 176; plasmid cured derivative of <i>S. flexneri</i> M90T                                                                                                                                                | Arturo Zychlinsky; (105) |
| $\Delta$ <i>rpoS</i>                                                           | <i>S. typhimurium</i>    | JVS-5487   | SL1344 $\Delta$ <i>rpoS::Cm<sup>R</sup></i>                                                                                                                                                                | K. Tedin (KT4676)        |
| <i>sdsR::lacZ</i>                                                              | <i>S. typhimurium</i>    | JVS-8717   | SL1344 <i>sdsR::lacZ::Kan<sup>R</sup></i>                                                                                                                                                                  | This study               |
| <i>osmY::lacZ</i>                                                              | <i>S. typhimurium</i>    | JVS-9145   | SL1344 <i>osmY::lacZ::Kan<sup>R</sup></i>                                                                                                                                                                  | J. Casadesus (SV6068)    |
|                                                                                | <i>S. typhimurium</i>    | JVS-0028   | SL1344 $\Delta$ <i>sdsR::Kan<sup>R</sup></i>                                                                                                                                                               | (27)                     |
| $\Delta$ <i>sdsR</i>                                                           | <i>S. typhimurium</i>    | JVS-8827   | SL1344 $\Delta$ <i>sdsR</i>                                                                                                                                                                                | This study               |
| $\Delta$ <i>ompD</i>                                                           | <i>S. typhimurium</i>    | JVS-0735   | SL1344 $\Delta$ <i>ompD::Kan<sup>R</sup></i>                                                                                                                                                               | (57)                     |
| $\Delta$ <i>sdsR \Delta</i> <i>ompD</i>                                        | <i>S. typhimurium</i>    | JVS-8434   | SL1344 $\Delta$ <i>sdsR \Delta</i> <i>ompD::Kan<sup>R</sup></i>                                                                                                                                            | This study               |
|                                                                                | <i>S. typhimurium</i>    | JVS-6999   | SL1344 [ <i>rluC-rne</i> ]IG:: <i>cat</i>                                                                                                                                                                  | L. Bossi; (74)           |
|                                                                                | <i>S. typhimurium</i>    | JVS-7000   | SL1344 [ <i>rluC-rne</i> ]IG:: <i>cat rne-3071 (ts)</i>                                                                                                                                                    | L. Bossi; (74)           |
| <i>rne</i> -ctrl.                                                              | <i>S. typhimurium</i>    | JVS-9549   | SL1344 [ <i>rluC-rne</i> ]IG:: <i>cat \Delta</i> <i>sdsR \Delta</i> <i>micC \Delta</i> <i>rybB \Delta</i> <i>invR</i>                                                                                      | This study               |
| <i>rne</i> -TS                                                                 | <i>S. typhimurium</i>    | JVS-9550   | SL1344 [ <i>rluC-rne</i> ]IG:: <i>cat rne-3071 (ts) \Delta</i> <i>sdsR \Delta</i> <i>micC \Delta</i> <i>rybB \Delta</i> <i>invR</i>                                                                        | This study               |
|                                                                                | <i>S. typhimurium</i>    | JVS-8799   | SL1344 $\Delta$ <i>sdsR \Delta</i> <i>micC \Delta</i> <i>rybB \Delta</i> <i>invR</i>                                                                                                                       | This study               |
|                                                                                | <i>S. typhimurium</i>    | JVS-8827   | SL1344 $\Delta$ <i>micC \Delta</i> <i>rybB \Delta</i> <i>invR</i>                                                                                                                                          | This study               |
|                                                                                | <i>S. typhimurium</i>    | JVS-8798   | SL1344 $\Delta$ <i>sdsR \Delta</i> <i>micC \Delta</i> <i>invR</i>                                                                                                                                          | This study               |
| $P_{tet}$ <i>ompD</i>                                                          | <i>S. typhimurium</i>    | JVS-9488   | SL1344 $Cm^R::P_{LtetO-1-ompD}$                                                                                                                                                                            | This study               |
| $P_{tet}$ <i>ompD \Delta</i> <i>micC \Delta</i> <i>rybB \Delta</i> <i>invR</i> | <i>S. typhimurium</i>    | JVS-9491   | SL1344 $\Delta$ <i>micC \Delta</i> <i>rybB \Delta</i> <i>invR Cm^R::P_{LtetO-1-ompD}</i>                                                                                                                   | This study               |
| $P_{tet}$ <i>ompD \Delta</i> <i>sdsR \Delta</i> <i>micC \Delta</i> <i>invR</i> | <i>S. typhimurium</i>    | JVS-9655   | SL1344 $\Delta$ <i>sdsR \Delta</i> <i>micC \Delta</i> <i>invR Cm^R::P_{LtetO-1-ompD}</i>                                                                                                                   | This study               |
| $\Delta$ <i>sdsR ompD</i>                                                      | <i>S. typhimurium</i>    | JVS-9154   | SL1344 $\Delta$ <i>sdsR Cm^R::ompD</i>                                                                                                                                                                     | This study               |
| $\Delta$ <i>sdsR ompD</i> *                                                    | <i>S. typhimurium</i>    | JVS-9155   | SL1344 $\Delta$ <i>sdsR Cm^R::ompD</i> *                                                                                                                                                                   | This study               |
| $\Delta$ <i>relA \Delta</i> <i>spoT</i>                                        | <i>S. typhimurium</i>    | JVS-1505   | SL1344 $\Delta$ <i>relA \Delta</i> <i>spoT211::Tn10</i>                                                                                                                                                    | K. Tedin (KT4478)        |
| $\Delta$ <i>sdsR \Delta</i> <i>rpoS</i>                                        | <i>S. typhimurium</i>    | JVS-9551   | SL1344 $\Delta$ <i>sdsR \Delta</i> <i>rpoS::Kan<sup>R</sup></i>                                                                                                                                            | This study               |
|                                                                                | <i>S. typhimurium</i>    | JVS-0051   | SL1344 $\Delta$ <i>micC::Kan<sup>R</sup></i>                                                                                                                                                               | (27)                     |
|                                                                                | <i>S. typhimurium</i>    | JVS-0127   | SL1344 $\Delta$ <i>rybB::Kan<sup>R</sup></i>                                                                                                                                                               | (21)                     |
|                                                                                | <i>S. typhimurium</i>    | JVS-0175   | SL1344 $\Delta$ <i>invR::Kan<sup>R</sup></i>                                                                                                                                                               | (53)                     |
| $\Delta$ <i>PsraC</i>                                                          | <i>S. typhimurium</i>    | JVS-9251   | SL1344 $\Delta$ <i>PsraC</i>                                                                                                                                                                               | This study               |
|                                                                                | <i>E. coli</i>           | JVS-1382   | MC4100 $\Delta$ <i>rpoS::Tn10</i>                                                                                                                                                                          | S. Altuvia               |
| $\Delta$ <i>rpoS</i>                                                           | <i>E. coli</i>           | JVS-9322   | MC4100 <i>relA+ \Delta</i> <i>rpoS::Tn10</i>                                                                                                                                                               | This study               |
| $\Delta$ <i>PsraC</i>                                                          | <i>E. coli</i>           | JVS-9312   | MC4100 <i>relA+ \Delta</i> <i>PsraC</i>                                                                                                                                                                    | This study               |
| TOP10                                                                          | <i>E. coli</i>           |            | F <sup>-</sup> <i>mcrA \Delta</i> ( <i>mrr-hsdRMS-mcrBC</i> ) $\Phi$ 80 <i>lacZ \Delta</i> M15 $\Delta$ <i>lacX74 recA1 araD139 \Delta</i> ( <i>ara-leu</i> )7697 <i>galU galK rpsL endA1 nupG \lambda</i> | Invitrogen               |

## Supplementary References

103. Cherepanov, P.P. and Wackernagel, W. (1995) Gene disruption in *Escherichia coli*: TcR and KmR cassettes with the option of FLP-catalyzed excision of the antibiotic-resistance determinant. *Gene*, **158**, 9-14.
104. Sanden, A.M., Prytz, I., Tubulekas, I., Forberg, C., Le, H., Hektor, A., Neubauer, P., Pragai, Z., Harwood, C., Ward, A. *et al.* (2003) Limiting factors in *Escherichia coli* fed-batch production of recombinant proteins. *Biotechnol Bioeng*, **81**, 158-166.
105. Zychlinsky, A., Prevost, M.C. and Sansonetti, P.J. (1992) *Shigella flexneri* induces apoptosis in infected macrophages. *Nature*, **358**, 167-169.
